# Supplementary material for: Controlled synthesis of ZnxCd1−xS nanorods and their composite with RGO for high-performance visible-light photocatalysis
Source: Royal Society of Chemistry journal article supplement (doi:10.1039/c5ra01846c), 2015-01-01
Supplement: c5ra01846c1.pdf [file c5ra01846c1.pdf]

## Supporting Information

### Controlled Synthesis of $Zn_xCd_{1-x}S$ Nanorods and Their Composite with RGO for High-Performance Visible-Light Photocatalysis

Anping Ma,<sup>a,b</sup> Zhihong Tang,<sup>a</sup> Shuling Shen,<sup>a\*</sup> Linjie Zhi,<sup>a</sup> and Junhe Yang<sup>a\*</sup>

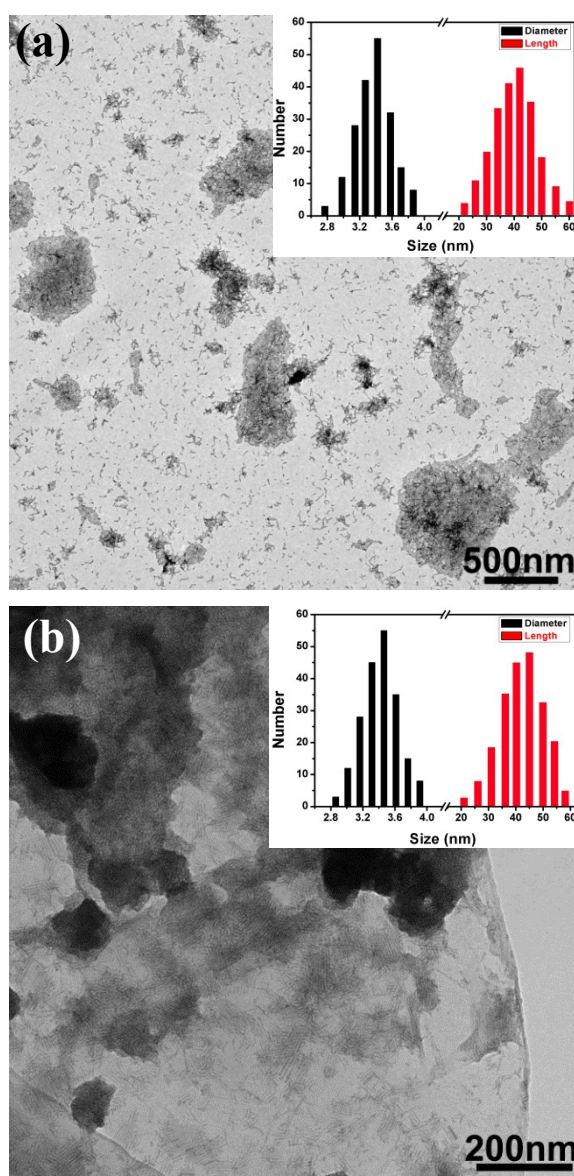

**Fig. S1** Low magnification TEM images of  $Zn_{0.5}Cd_{0.5}S$  nanorods and  $Zn_{0.5}Cd_{0.5}S/2\%RGO$  nanocomposites to show the morphology change of  $Zn_{0.5}Cd_{0.5}S$  nanorods after forming composite with RGO. (Inset: corresponding diameter and length distribution of  $Zn_{0.5}Cd_{0.5}S$  nanorods, which was determined by measuring more than 200 particles).

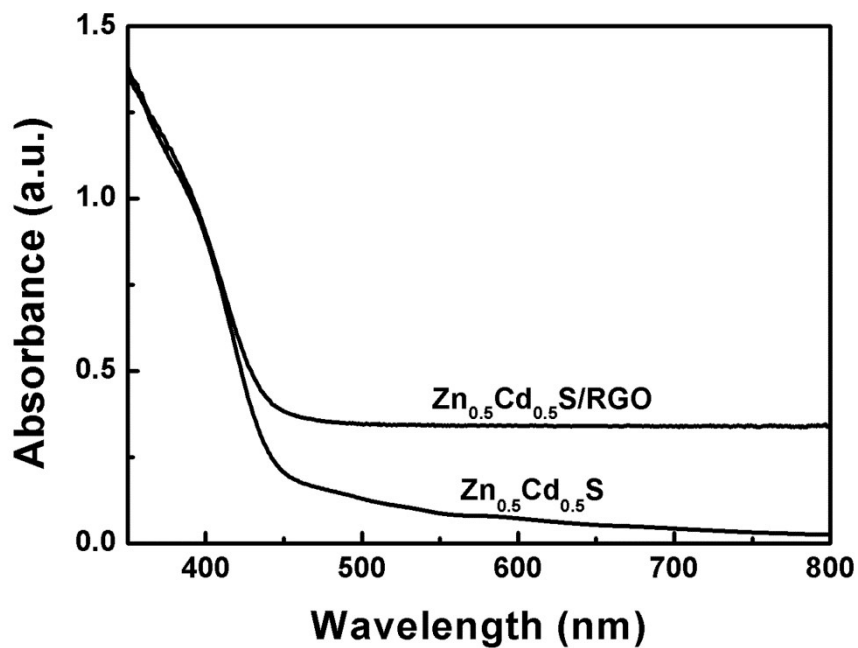

Fig. S2 UV-Vis absorbance spectra of Zn<sub>0.5</sub>Cd<sub>0.5</sub>S nanorods and Zn<sub>0.5</sub>Cd<sub>0.5</sub>S/2 wt% RGO nanocomposites.

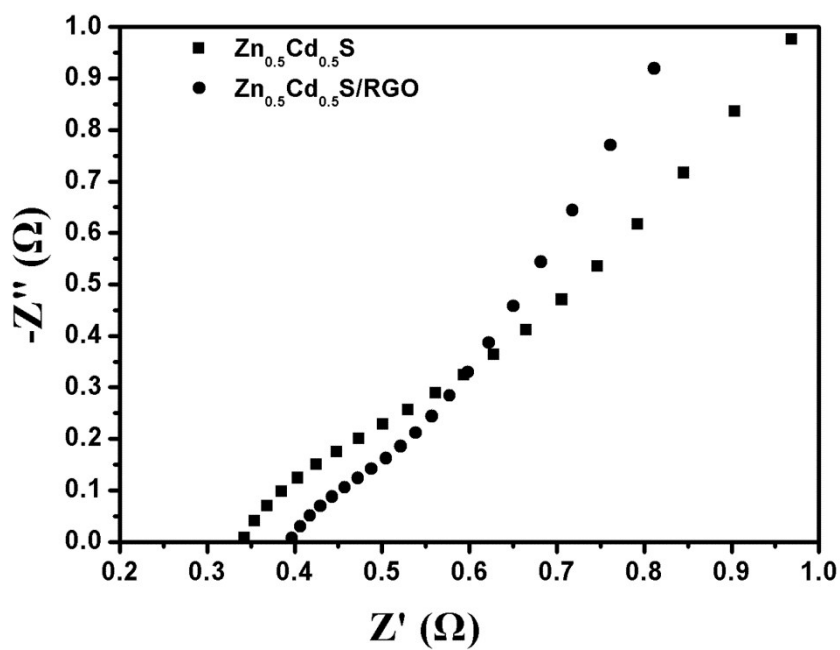

Fig. S3 Nyquist plots of Zn<sub>0.5</sub>Cd<sub>0.5</sub>S nanorods and Zn<sub>0.5</sub>Cd<sub>0.5</sub>S/2 wt% RGO nanocomposites.
